# Supplementary material
Source: bioRxiv or medRxiv preprint supplement (https://medrxiv.org/highwire/filestream/83402/field_highwire_adjunct_files/0/2020.05.25.20113050-1.pdf)
Supplement: Supplementary file [file 2020.05.25.20113050-1.pdf]

# Cumulative incidence and diagnosis of SARS-CoV-2 infection in New York

Eli S. Rosenberg PhD<sup>1</sup>, James M. Tesoriero PhD<sup>2</sup>, Elizabeth M. Rosenthal MPH<sup>1</sup>, Rakkoo Chung PhD<sup>2</sup>, Meredith A. Barranco MPH<sup>1</sup>, Linda M. Styer PhD<sup>3</sup>, Monica M. Parker PhD<sup>3</sup>, Shu-Yin John Leung MA<sup>2</sup>, Johanne E. Morne MS<sup>2</sup>, David Holtgrave PhD<sup>1</sup>, Dina Hoefler PhD<sup>2</sup>, Jessica Kumar DO<sup>2</sup>, Tomoko Udo PhD<sup>1</sup>, Brad Hutton MPH<sup>2</sup>, Howard A. Zucker, MD<sup>2</sup>

1. University at Albany School of Public Health, State University of New York, Rensselaer NY
2. New York State Department of Health, Albany NY
3. Wadsworth Center, New York State Department of Health, Albany NY

## Supplemental material

### Contents

|                                                                                                                                                                                   |   |
|-----------------------------------------------------------------------------------------------------------------------------------------------------------------------------------|---|
| Validation Studies.....                                                                                                                                                           | 2 |
| Part 1. Assay Specificity .....                                                                                                                                                   | 2 |
| eTable 1. Cutoff assay using normal human dry blood spots (DBS) .....                                                                                                             | 2 |
| eTable 2. Serum collected from patients with antibodies to the indicated non-respiratory agents tested for reactivity to the SARS CoV-1 N protein.....                            | 2 |
| eTable 3. Serum collected from patients diagnosed with the indicated Non-COVID 19 respiratory agents tested for reactivity to the SARS CoV-1 N and SARS CoV-2 N protein.....      | 3 |
| Part 2. Assay Sensitivity.....                                                                                                                                                    | 3 |
| eTable 4. Assay results for a set of 232 individuals with self-reported positive PCR results, with median (IQR) days from symptom onset to DBS collection.....                    | 3 |
| Part 3 – SARS CoV-1 N vs. SARS CoV-2 N assay comparison .....                                                                                                                     | 4 |
| eFigure. Comparison of MFI values for DBS samples tested by the SARS CoV-1 N versus SARS CoV-2 N assay.....                                                                       | 4 |
| eTable 5. Comparison of qualitative results of the same samples tested by the SARS CoV-1 N vs SARS CoV-2 N assay.....                                                             | 4 |
| Sensitivity analyses for cumulative incidence and percent diagnosed.....                                                                                                          | 5 |
| eTable 6. Reactivity and test-characteristic adjusted cumulative incidence of COVID-19, overall and by demographic factors and region: sensitivity 92.1%, specificity 96.1% ..... | 5 |
| eTable 7. Reactivity and test-characteristic adjusted cumulative incidence of COVID-19, overall and by demographic factors and region: sensitivity 83.7%, specificity 100% .....  | 6 |
| eTable 8. Estimated percentage of SARS-COV-2 infections diagnosed by last plausible diagnosis date .....                                                                          | 7 |

**Validation Studies**

**Part 1. Assay Specificity**

**eTable 1. Cutoff assay using normal human dry blood spots (DBS)**

Normal DBS collected prior to December 2019 were tested to establish background levels of reactivity to the SARS CoV-1 N and SARS CoV-2 N protein. Specificity for primary analyses was based on the mean of observed reactivity to each protein (99.5%, 100% respectively), which was 99.75%.

| Assay        | Number tested | Number > Mean + 3 SD | Number > Mean + 6 SD | Specificity     | 95% CI    |
|--------------|---------------|----------------------|----------------------|-----------------|-----------|
| SARS CoV-1 N | 196           | 5                    | 1                    | 195/196 = 99.5% | 98.5-100% |
| SARS CoV-2 N | 92            | 2                    | 0                    | 92/92 = 100%    | 96.1-100% |

**eTable 2. Serum collected from patients with antibodies to the indicated non-respiratory agents tested for reactivity to the SARS CoV-1 N protein.**

| Analyte                | Number tested | Number > Mean + 3 SD | Number > Mean + 6 SD |
|------------------------|---------------|----------------------|----------------------|
| Antinuclear antibodies | 3             | 0                    | 0                    |
| Chikungunya virus      | 3             | 0                    | 0                    |
| Dengue virus           | 3             | 0                    | 0                    |
| Enterovirus            | 2             | 0                    | 0                    |
| Epstein Barr Virus     | 3             | 0                    | 0                    |
| Hepatitis C virus      | 3             | 0                    | 0                    |
| Herpes Simplex virus   | 3             | 0                    | 0                    |
| HIV                    | 3             | 0                    | 0                    |
| Measles                | 6             | 0                    | 0                    |
| Mumps                  | 6             | 0                    | 0                    |
| Parvovirus B19         | 4             | 0                    | 0                    |
| Rheumatoid Factor      | 3             | 0                    | 0                    |
| Rubella                | 3             | 0                    | 0                    |
| Syphilis               | 3             | 1                    | 1                    |
| Varicella Zoster virus | 3             | 0                    | 0                    |
| West Nile Virus        | 3             | 0                    | 0                    |
| Zika virus             | 3             | 0                    | 0                    |
| <b>TOTAL</b>           | <b>57</b>     | <b>1</b>             | <b>1</b>             |

**eTable 3. Serum collected from patients diagnosed with the indicated Non-COVID 19 respiratory agents tested for reactivity to the SARS CoV-1 N and SARS CoV-2 N protein.**

| Analyte                   | SARS CoV-1 N  |                      |                      | SARS CoV-2 N  |                      |                      |
|---------------------------|---------------|----------------------|----------------------|---------------|----------------------|----------------------|
|                           | Number tested | Number > Mean + 3 SD | Number > Mean + 6 SD | Number tested | Number > Mean + 3 SD | Number > Mean + 6 SD |
| Human coronavirus NL63    | 6             | 0                    | 0                    | 4             | 0                    | 0                    |
| Human coronavirus OC43    | 2             | 0                    | 0                    | 2             | 0                    | 0                    |
| Human parainfluenza virus | 1             | 0                    | 0                    | 1             | 0                    | 0                    |
| Influenza                 | 6             | 0                    | 0                    | 15            | 1                    | 0                    |
| Metapneumovirus           | 6             | 0                    | 0                    | 6             | 0                    | 0                    |
| Rhinovirus                | 7             | 0                    | 0                    | 6             | 0                    | 0                    |
| <b>TOTAL</b>              | <b>28</b>     | <b>0</b>             | <b>0</b>             | <b>34</b>     | <b>1</b>             | <b>0</b>             |

**Part 2. Assay Sensitivity**

**eTable 4. Assay results for a set of 232 individuals with self-reported positive PCR results, with median (IQR) days from symptom onset to DBS collection**

| <u>Result</u> | <u>#</u> | <u>Median days post symptom onset</u> | <u>IQR</u> |
|---------------|----------|---------------------------------------|------------|
| Non-Reactive  | 21       | 33                                    | 28-37      |
| Indeterminate | 7        | 30                                    | 28-34      |
| Reactive      | 204      | 35                                    | 30-40      |
| TOTAL         | 232      |                                       |            |

Based on 204 of 232 reactive, estimate sensitivity was 87.9% (exact 95% CI: [83.7-92.1%])

**Part 3 – SARS CoV-1 N vs. SARS CoV-2 N assay comparison**

**eFigure. Comparison of MFI values for DBS samples tested by the SARS CoV-1 N versus SARS CoV-2 N assay**

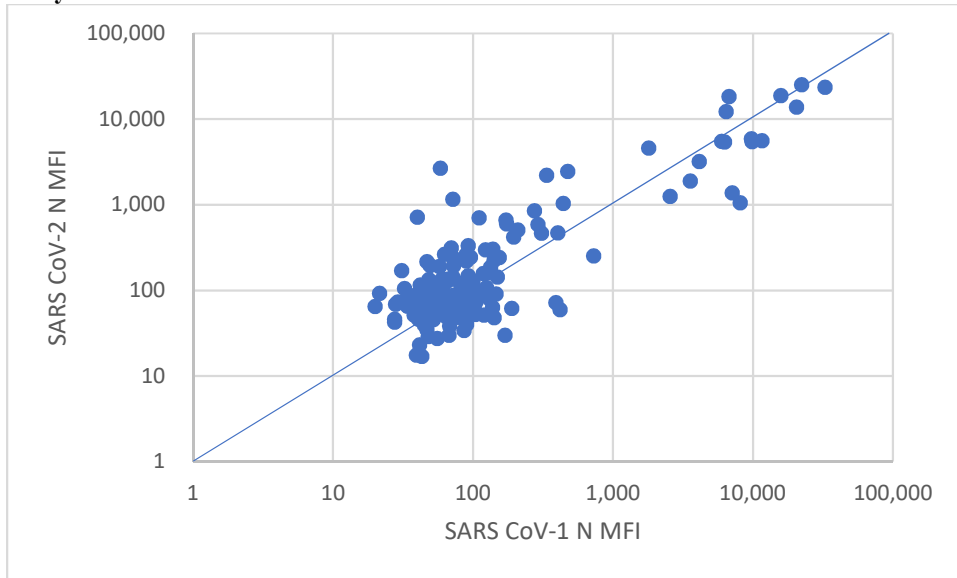

**eTable 5. Comparison of qualitative results of the same samples tested by the SARS CoV-1 N vs SARS CoV-2 N assay.**

|              |       | SARS CoV-2 N |     |     | TOTAL |
|--------------|-------|--------------|-----|-----|-------|
|              |       | R            | IND | NR  |       |
| SARS CoV-1 N | R     | 17           | 0   | 0   | 17    |
|              | IND   | 0            | 0   | 0   | 0     |
|              | NR    | 5            | 6   | 145 | 156   |
|              | TOTAL | 22           | 6   | 145 | 173   |

Concordance 162/173 94%      Results match exactly (NR-NR, IND-IND, R-R)  
 Discordance 5/173 3%      Reactive = Non-reactive, Non-reactive = Reactive

**Sensitivity analyses for cumulative incidence and percent diagnosed**

**eTable 6. Reactivity and test-characteristic adjusted cumulative incidence of COVID-19, overall and by demographic factors and region: sensitivity 92.1%, specificity 96.1%**

|                                   | Reactivity                                 |                     | Test-characteristic adjusted estimated cumulative incidence |             |                                                  |                       |                                          |
|-----------------------------------|--------------------------------------------|---------------------|-------------------------------------------------------------|-------------|--------------------------------------------------|-----------------------|------------------------------------------|
|                                   | Unweighted #<br>Reactive / Total<br>Sample | Weighted<br>percent | %                                                           | (95% CI)    | Infection-<br>experienced<br>adults <sup>a</sup> | (95% CI)              | % of Infection-<br>experienced<br>adults |
| <b>Overall</b>                    | 1,887/15,101                               | 12.5                | 9.8                                                         | (9.1-10.5)  | 1,494,700                                        | (1,391,800-1,597,600) | 100.0                                    |
| <b>Sex</b>                        |                                            |                     |                                                             |             |                                                  |                       |                                          |
| Male                              | 918/6,635                                  | 13.2                | 10.6                                                        | (9.6-11.6)  | 769,200                                          | (695,000-843,400)     | 51.5%                                    |
| Female                            | 969/8,466                                  | 11.9                | 9.1                                                         | (8.2-10.0)  | 724,900                                          | (653,700-796,200)     | 48.5%                                    |
| <b>Race/Ethnicity</b>             |                                            |                     |                                                             |             |                                                  |                       |                                          |
| Hispanic or Latino                | 757/2,735                                  | 25.8                | 24.9                                                        | (22.9-26.9) | 661,300                                          | (608,400-714,100)     | 24.9                                     |
| NH-White                          | 623/9,545                                  | 7.3                 | 3.9                                                         | (3.2-4.5)   | 344,500                                          | (286,500-402,500)     | 3.9                                      |
| NH-Black/African<br>American      | 388/1,913                                  | 18.0                | 15.9                                                        | (13.8-18.1) | 337,800                                          | (292,700-382,900)     | 15.9                                     |
| NH-Asian                          | 75/629                                     | 11.1                | 8.2                                                         | (5.2-11.1)  | 106,600                                          | (67,800-145,500)      | 8.2                                      |
| NH-Multi/Other                    | 44/279                                     | 10.7                | 7.7                                                         | (2.2-13.2)  | 25,100                                           | (7,300-43,000)        | 7.7                                      |
| <b>Age group</b>                  |                                            |                     |                                                             |             |                                                  |                       |                                          |
| 18-34                             | 377/3,151                                  | 13.0                | 10.4                                                        | (8.9-11.9)  | 484,900                                          | (414,700-555,100)     | 10.4                                     |
| 35-44                             | 334/2,628                                  | 13.7                | 11.1                                                        | (9.4-12.7)  | 269,100                                          | (229,200-308,900)     | 11.1                                     |
| 45-54                             | 479/3,345                                  | 14.3                | 11.8                                                        | (10.3-13.2) | 312,500                                          | (274,300-350,600)     | 11.8                                     |
| 55+                               | 697/5,977                                  | 10.9                | 7.9                                                         | (7.0-8.9)   | 435,900                                          | (384,000-487,800)     | 7.9                                      |
| <b>Region</b>                     |                                            |                     |                                                             |             |                                                  |                       |                                          |
| New York City <sup>b</sup>        | 1,319/5,946                                | 20.2                | 18.5                                                        | (17.2-19.7) | 1,221,700                                        | (1,139,100-1,304,300) | **                                       |
| Westchester/<br>Rockland Counties | 134/980                                    | 14.4                | 11.9                                                        | (9.0-14.8)  | 115,400                                          | (87,500-143,400)      | **                                       |
| Long Island <sup>c</sup>          | 241/2,074                                  | 11.9                | 9.0                                                         | (7.2-10.9)  | 198,800                                          | (157,900-239,700)     | **                                       |
| Rest of NYS <sup>d, e</sup>       | 193/6,101                                  | 3.4                 | **                                                          | ****        | **                                               | ****                  | **                                       |

- a. Stratified estimates may not exactly sum to total due to rounding and differences between weighting scheme and non-institutionalized population totals
- b. Boroughs of Bronx, Brooklyn, Manhattan, Queens, Staten Island
- c. Nassau and Suffolk Counties
- d. Albany, Allegany, Broome, Cattaraugus, Cayuga, Chautauqua, Chemung, Chenango, Clinton, Columbia, Cortland, Delaware, Dutchess, Erie, Essex, Franklin, Fulton, Genessee, Greene, Hamilton, Herkimer, Jefferson, Lewis, Livingston, Madison, Monroe, Montgomery, Niagara, Oneida, Onondaga, Ontario, Orange, Orleans, Oswego, Otsego, Putnam, Rensselaer, St. Lawrence, Saratoga, Schenectady, Schoharie, Schuyler, Seneca, Steuben, Sullivan, Tioga, Tompkins, Ulster, Warren, Washington, Wayne, Wyoming, Yates counties
- e. Estimated values for Rest of NYS are negative, due to antibody prevalence < 1 - specificity (observed results may be dominated by false positives). True cumulative incidence is greater than 0, as evidence by diagnosed cases, rendering study-based cumulative incidence inestimable under these test characteristics. Values that cannot be estimated are indicated with \*\* in table.

**eTable 7. Reactivity and test-characteristic adjusted cumulative incidence of COVID-19, overall and by demographic factors and region: sensitivity 83.7%, specificity 100%**

|                                   | Reactivity                              |                     | Test-characteristic adjusted estimated cumulative incidence |             |                                                  |                       |                                          |
|-----------------------------------|-----------------------------------------|---------------------|-------------------------------------------------------------|-------------|--------------------------------------------------|-----------------------|------------------------------------------|
|                                   | Unweighted #<br>Reactive / Total Sample | Weighted<br>percent | %                                                           | (95% CI)    | Infection-<br>experienced<br>adults <sup>a</sup> | (95% CI)              | % of Infection-<br>experienced<br>adults |
| <b>Overall</b>                    | 1,887/15,101                            | 12.5                | 15.0                                                        | (14.3-15.7) | 2,286,600                                        | (2,178,200-2,395,100) | 100.0                                    |
| <b>Sex</b>                        |                                         |                     |                                                             |             |                                                  |                       |                                          |
| Male                              | 918/6,635                               | 13.2                | 15.8                                                        | (14.7-16.9) | 1,149,500                                        | (1,071,300-1,227,600) | 50.3                                     |
| Female                            | 969/8,466                               | 11.9                | 14.2                                                        | (13.3-15.2) | 1,136,600                                        | (1,061,500-1,211,700) | 49.7                                     |
| <b>Race/Ethnicity</b>             |                                         |                     |                                                             |             |                                                  |                       |                                          |
| Hispanic or Latino                | 757/2,735                               | 25.8                | 30.9                                                        | (28.8-33.0) | 820,700                                          | (765,000-876,400)     | 36.2                                     |
| NH-White                          | 623/9,545                               | 7.3                 | 8.8                                                         | (8.1-9.4)   | 775,900                                          | (714,800-837,000)     | 34.2                                     |
| NH-Black/African American         | 388/1,913                               | 18.0                | 21.5                                                        | (19.2-23.7) | 454,700                                          | (407,200-502,200)     | 20.1                                     |
| NH-Asian                          | 75/629                                  | 11.1                | 13.3                                                        | (10.1-16.4) | 173,300                                          | (132,300-214,300)     | 7.6                                      |
| NH-Multi/Other                    | 44/279                                  | 10.7                | 12.8                                                        | (7.0-18.6)  | 41,600                                           | (22,800-60,500)       | 1.8                                      |
| <b>Age group</b>                  |                                         |                     |                                                             |             |                                                  |                       |                                          |
| 18-34                             | 377/3,151                               | 13.0                | 15.6                                                        | (14.0-17.2) | 729,100                                          | (655,100-803,100)     | 31.8                                     |
| 35-44                             | 334/2,628                               | 13.7                | 16.3                                                        | (14.6-18.1) | 396,700                                          | (354,700-438,700)     | 17.3                                     |
| 45-54                             | 479/3,345                               | 14.3                | 17.1                                                        | (15.6-18.6) | 452,800                                          | (412,700-493,000)     | 19.7                                     |
| 55+                               | 697/5,977                               | 10.9                | 13.0                                                        | (12.0-14.0) | 716,000                                          | (661,300-770,600)     | 31.2                                     |
| <b>Region</b>                     |                                         |                     |                                                             |             |                                                  |                       |                                          |
| New York City <sup>b</sup>        | 1,319/5,946                             | 20.2                | 24.1                                                        | (22.8-25.4) | 1,595,700                                        | (1,508,700-1,682,800) | 69.5                                     |
| Westchester/<br>Rockland Counties | 134/980                                 | 14.4                | 17.2                                                        | (14.2-20.2) | 166,800                                          | (137,400-196,300)     | 7.3                                      |
| Long Island <sup>c</sup>          | 241/2,074                               | 11.9                | 14.2                                                        | (12.2-16.1) | 312,200                                          | (269,100-355,400)     | 13.6                                     |
| Rest of NYS <sup>d</sup>          | 193/6,101                               | 3.4                 | 4.0                                                         | (3.4-4.6)   | 220,200                                          | (186,700-253,700)     | 9.6                                      |

- a. Stratified estimates may not exactly sum to total due to rounding and differences between weighting scheme and non-institutionalized population totals
- b. Boroughs of Bronx, Brooklyn, Manhattan, Queens, Staten Island
- c. Nassau and Suffolk Counties
- d. Albany, Allegany, Broome, Cattaraugus, Cayuga, Chautauqua, Chemung, Chenango, Clinton, Columbia, Cortland, Delaware, Dutchess, Erie, Essex, Franklin, Fulton, Genessee, Greene, Hamilton, Herkimer, Jefferson, Lewis, Livingston, Madison, Monroe, Montgomery, Niagara, Oneida, Onondaga, Ontario, Orange, Orleans, Oswego, Otsego, Putnam, Rensselaer, St. Lawrence, Saratoga, Schenectady, Schoharie, Schuyler, Seneca, Steuben, Sullivan, Tioga, Tompkins, Ulster, Warren, Washington, Wayne, Wyoming, Yates counties

**eTable 8. Estimated percentage of SARS-COV-2 infections diagnosed by last plausible diagnosis date**

|                                   | Estimated infection-experienced adults |                       | Diagnosed adults through May 8, 2020 |             |             |                       |
|-----------------------------------|----------------------------------------|-----------------------|--------------------------------------|-------------|-------------|-----------------------|
|                                   | Adults                                 | 95% CI                | Diagnoses                            | % diagnosed | (95% CI)    | % of diagnosed adults |
| <b>Overall</b>                    | 2,139,300                              | (203,5800-2,242,800)  | 335,770                              | 15.7        | (15.0-16.5) | 100.0                 |
| <b>Sex</b>                        |                                        |                       |                                      |             |             |                       |
| Male                              | 1,076,500                              | (1,001,900-1,151,100) | 172,238                              | 16.0        | (15.0-17.2) | 51.6                  |
| Female                            | 1,062,200                              | (990,500-1,133,800)   | 161,799                              | 15.2        | (14.3-16.3) | 48.4                  |
| Unknown                           |                                        |                       | 1,733                                |             |             |                       |
| <b>Age</b>                        |                                        |                       |                                      |             |             |                       |
| 18-34                             | 682,600                                | (612,000-753,200)     | 71,427                               | 10.5        | (9.5-11.7)  | 21.9                  |
| 35-44                             | 371,800                                | (331,700-411,900)     | 54,792                               | 14.7        | (13.3-16.5) | 16.8                  |
| 45-54                             | 424,700                                | (386,400-463,100)     | 61,054                               | 14.4        | (13.2-15.8) | 18.8                  |
| 55+                               | 667,800                                | (615,600-719,900)     | 138,312                              | 20.7        | (19.2-22.5) | 42.5                  |
| Missing/Invalid                   |                                        |                       | 851                                  |             |             |                       |
| <b>Region</b>                     |                                        |                       |                                      |             |             |                       |
| New York City <sup>a</sup>        | 1,504,400                              | (1,421,300-1,587,500) | 187,623                              | 12.5        | (11.8-13.2) | 55.9                  |
| Westchester/<br>Rockland Counties | 156,500                                | (128,400-184,600)     | 39,967                               | 25.5        | (21.7-31.1) | 11.9                  |
| Long Island <sup>b</sup>          | 291,800                                | (250,600-332,900)     | 75,100                               | 25.7        | (22.6-30.0) | 22.4                  |
| Rest of State <sup>c</sup>        | 194,600                                | (162,600-226,600)     | 33,080                               | 17.0        | (14.6-20.3) | 9.9                   |

- a. Boroughs of Bronx, Brooklyn, Manhattan, Queens, Staten Island
- b. Nassau and Suffolk Counties
- c. Albany, Allegany, Broome, Cattaraugus, Cayuga, Chautauqua, Chemung, Chenango, Clinton, Columbia, Cortland, Delaware, Dutchess, Erie, Essex, Franklin, Fulton, Genessee, Greene, Hamilton, Herkimer, Jefferson, Lewis, Livingston, Madison, Monroe, Montgomery, Niagara, Oneida, Onondaga, Ontario, Orange, Orleans, Oswego, Otsego, Putnam, Rensselaer, St. Lawrence, Saratoga, Schenectady, Schoharie, Schuyler, Seneca, Steuben, Sullivan, Tioga, Tompkins, Ulster, Warren, Washington, Wayne, Wyoming, Yates counties
